# Supplementary material for: A SNP-Based High-Density Genetic Map of Leaf and Fruit Related Quantitative Trait Loci in Wolfberry (Lycium Linn.)
Source: Front Plant Sci. 2019 Aug 7;10:977. doi: 10.3389/fpls.2019.00977 (PMC6693522; doi:10.3389/fpls.2019.00977)
Supplement: TABLE S1 — Basic sequencing information statistics of all materials. [file Table_1.xlsx]

## Sheet: Table 1
Basic sequencing information statistics of all materials.
Sample ID	SLAF number	Depth	Average depth
M	377632	19324798	51.1736
P	342348	10478630	30.6081
aa	196842	2952003	14.9968
ab	197977	3396729	17.1572
ac	186394	2688144	14.4218
ad	180365	2167919	12.0196
ae	168685	1748029	10.3627
af	164910	1855864	11.2538
ag	186077	2249317	12.0881
ah	178044	2186707	12.2818
ai	177921	2010004	11.2972
aj	166912	1781713	10.6746
ak	173232	1975359	11.403
al	175976	2095812	11.9096
am	164956	1814151	10.9978
an	191690	2910122	15.1814
ao	178393	2253395	12.6316
ap	181552	2802217	15.4348
aq	183299	2712002	14.7955
ar	186897	2416235	12.9282
as	172187	2150131	12.4872
at	167875	2096563	12.4888
au	190101	3274240	17.2237
av	187351	2584171	13.7932
aw	189530	3613698	19.0666
ax	241041	7396081	30.6839
ay	195938	4060237	20.722
az	167500	2627302	15.6854
ba	193544	3364247	17.3823
bb	174108	2638258	15.153
bc	193503	3280406	16.9527
bd	175309	3043134	17.3587
be	182078	3366467	18.4891
bf	195070	2995472	15.3559
bg	177134	2818413	15.9112
bh	172811	2964248	17.1531
bi	186937	3294426	17.6232
bj	180667	3307075	18.3048
bk	195388	3459332	17.7049
bl	183886	2830868	15.3947
bm	182198	2653210	14.5622
bn	197048	3485054	17.6863
bo	182630	2540502	13.9106
bp	176752	2348640	13.2878
bq	184200	2219933	12.0518
br	188436	2931857	15.5589
bs	183527	2675906	14.5804
bt	186094	2751766	14.787
bu	169832	2301072	13.5491
bv	178932	2690711	15.0376
bw	190376	2775397	14.5785
bx	146250	1477207	10.1006
by	173812	2230993	12.8357
bz	220742	4452813	20.172
ca	189807	2923583	15.4029
cb	210725	4608133	21.868
cc	193813	3257204	16.8059
cd	182721	2775698	15.1909
ce	174013	2649939	15.2284
cf	180518	3027655	16.772
cg	191703	3341236	17.4292
ch	188272	3278966	17.4161
ci	197826	3645311	18.4269
cj	188330	3062792	16.2629
ck	197460	3078894	15.5925
cl	185517	2933211	15.811
cm	198561	3573854	17.9988
cn	194232	3243841	16.7009
co	203215	4439605	21.8468
cp	189530	3171136	16.7316
cq	183987	2980568	16.1999
cr	202136	3707733	18.3428
cs	198701	5207482	26.2076
ct	176532	3166403	17.9367
cu	194844	4330256	22.2242
cv	182892	4155920	22.7234
cw	186954	3722385	19.9107
cx	192103	3943692	20.529
cy	210318	4349527	20.6807
cz	200862	3875881	19.2962
da	207935	4889217	23.5132
db	202802	4140494	20.4164
dc	209925	4526947	21.5646
dd	203059	4628976	22.7962
de	214060	5738399	26.8074
df	196358	4427790	22.5496
dg	201513	4586770	22.7617
dh	187132	3870691	20.6843
di	195448	4338380	22.1971
dj	198584	4692021	23.6274
dk	206174	5876653	28.5034
dl	193072	5410155	28.0214
dm	199906	4687988	23.451
dn	193678	4154978	21.453
do	194991	4387395	22.5005
dp	194963	5153149	26.4314
dq	190218	5026611	26.4255
dr	203134	5569218	27.4165
ds	200943	4741176	23.5946
dt	184513	4221534	22.8793
du	194900	4008276	20.5658
dv	201714	4594681	22.7782
dw	186653	4674248	25.0424
dx	208896	5246553	25.1156
dy	183481	3952161	21.5399
dz	184903	3993219	21.5963
ea	199503	4967524	24.8995
eb	179258	3805561	21.2295
ec	180999	4398155	24.2993
ed	198999	5151195	25.8855
ee	200327	5530282	27.6063
ef	181472	4187928	23.0775
eg	172886	3887125	22.4837
eh	180786	4056500	22.4381
ei	183522	4678606	25.4934
ej	178428	4504040	25.2429
ek	166801	3261368	19.5524
el	182280	4932025	27.0574
em	173083	4174936	24.121
en	159849	3076238	19.2446
eo	186757	5016754	26.8625
ep	188078	3954407	21.0254
eq	205308	5603379	27.2926
er	181348	4407841	24.306
es	203918	4969331	24.3693
et	192412	5053268	26.2627
eu	195764	5477930	27.9823
ev	205335	5428280	26.4362
ew	203127	5963851	29.3602
ex	157415	3592362	22.821
ey	190200	4785855	25.1622
ez	172444	3509000	20.3486
fa	184005	4462544	24.2523
fb	161550	3522454	21.8041
fc	177475	4074132	22.9561
fd	174718	4145002	23.724
fe	188921	4749135	25.1382
ff	178115	4701091	26.3936
fg	176681	3488256	19.7432
fh	188089	4775751	25.3909
fi	180688	3825965	21.1744
fj	190180	4093283	21.5232
fk	215296	5853290	27.1872
fl	227657	6945888	30.5103
fm	202729	4781080	23.5836
fn	202785	4256616	20.9908
fo	196681	4008984	20.3832
fp	206468	4219257	20.4354
fq	196063	3982098	20.3103
fr	204708	5081747	24.8244
fs	206501	4756858	23.0355
ft	172698	3747697	21.7009
fu	187212	3790709	20.2482
fv	171183	3128893	18.2781
fw	201415	4352748	21.6108
fx	200868	4000355	19.9153
fy	213320	4684095	21.9581
fz	206865	4537902	21.9365
ga	182098	3524850	19.3569
gb	193808	4303837	22.2067
gc	199375	4095956	20.544
gd	198866	4776781	24.0201
ge	214184	5447822	25.4352
gf	205162	4726690	23.0388
gg	206000	4602675	22.3431
gh	210314	4373651	20.7958
gi	218645	6061433	27.7227
gj	205091	4170200	20.3334
gk	243295	6651031	27.3373
gl	203553	4071082	20.0001
gm	200307	5019276	25.0579
gn	188394	3937592	20.9008
go	196626	4544341	23.1116
gp	200838	4367380	21.7458
gq	241693	6285181	26.0048
gr	232343	5991787	25.7885
gs	238660	6673730	27.9633
gt	231524	6616447	28.5778
gu	223054	6037812	27.0688
gv	241296	8422028	34.9033
gw	245365	8225468	33.5234
gx	234512	6260381	26.6954
gy	235679	6791519	28.8168
gz	218107	5498748	25.2112
ha	216781	5358883	24.7203
hb	221356	4784462	21.6143
hc	238983	7134612	29.8541
hd	211942	5315279	25.0789
he	201781	4175500	20.6932
hf	224794	5619057	24.9965
hg	228135	5859854	25.6859
hh	238645	7777766	32.5914
hi	233984	6414633	27.4148
hj	229008	6126454	26.7521
hk	277220	13515740	48.7546
hl	228051	5723148	25.0959
hm	311556	13263549	42.572
hn	236590	6989160	29.5412
ho	235442	6270031	26.6309
hp	220001	3797550	17.2615
hq	203211	3064044	15.0781
hr	202213	2604961	12.8823
hs	210642	3086669	14.6536
ht	213950	3478947	16.2606
hu	208649	4168844	19.9802
hv	207170	3507851	16.9322
hw	209243	4203767	20.0904
hx	182678	2307014	12.6289
hy	202767	3022010	14.9039
hz	202831	2834854	13.9764
ia	222198	3937127	17.719
ib	225290	4448029	19.7436
ic	196826	2904093	14.7546
id	197248	2928767	14.8481
ie	189872	2998862	15.7941
if	201619	3240590	16.0728
ig	213919	3948483	18.4578
ih	199745	3288415	16.4631
ii	203221	3397193	16.7167
ij	194565	2885576	14.8309
ik	207132	4056302	19.5832
il	188224	2561599	13.6093
im	197999	2905882	14.6762
in	205969	3620030	17.5756
io	199667	3616685	18.1136
ip	215147	4184201	19.4481
iq	203759	3511196	17.2321
ir	203226	3735274	18.3799
is	216483	4450197	20.5568
it	190881	3037713	15.9142
iu	222198	4381356	19.7183
iv	210095	4590497	21.8496
iw	226337	4777787	21.1092
ix	223269	4633255	20.7519
iy	230053	5994366	26.0565
iz	235238	4861452	20.6661
ja	228433	4358791	19.0813
jb	225927	4638517	20.531
jc	218666	4871474	22.2782
jd	234268	6405931	27.3445
je	214224	4202301	19.6164
jf	218114	4234649	19.4148
jg	217446	4248219	19.5369
jh	230581	5479171	23.7625
ji	206985	4053940	19.5857
jj	212781	4438888	20.8613
jk	215509	4383262	20.3391
jl	193777	3540185	18.2694
jm	203259	3778787	18.591
jn	203991	3896368	19.1007
jo	211366	3943373	18.6566
jp	211109	3523269	16.6893
jq	211324	4014379	18.9963
jr	216665	4454520	20.5595
js	207018	4508302	21.7773
jt	215026	3524579	16.3914
ju	208130	3747577	18.0059
jv	228036	6529694	28.6345
jw	216183	5537417	25.6145
jx	204862	5795568	28.2901
jy	224312	6444193	28.7287
jz	219148	6668107	30.4274
ka	225298	6579628	29.2041
kb	224169	7368011	32.8681
kc	223718	6064221	27.1065
kd	209168	5055806	24.171
ke	208121	5024439	24.1419
kf	215285	5167479	24.003
kg	215957	6737258	31.1972
kh	225863	6569191	29.0848
ki	204506	5468248	26.7388
kj	214100	6078959	28.3931
kk	209346	5127458	24.4927
kl	213118	5834625	27.3774
km	220789	6612907	29.9513
kn	221121	6685473	30.2345
ko	190434	4290677	22.531
kp	203252	5093538	25.0602
kq	201986	5280056	26.1407
kr	226962	6863020	30.2386
ks	221280	5885659	26.5982
kt	213316	5984353	28.0539
ku	224034	8048371	35.9248
kv	213348	6278406	29.428
kw	220262	6002640	27.2523
kx	204569	6478421	31.6686
ky	217404	6979049	32.1018
kz	197664	6698424	33.8879
la	206220	5683453	27.5601
lb	195317	4900656	25.0908
lc	203118	5555047	27.3489
ld	201369	6052831	30.0584
le	205831	5465861	26.5551
lf	215528	5922622	27.4796
lg	220652	7833317	35.5008
lh	192995	4575517	23.708
li	214419	6978737	32.5472
lj	201105	5289985	26.3046
lk	196547	5629597	28.6425
ll	191682	4593895	23.9662
lm	200677	6593328	32.8554
ln	201292	6256676	31.0826
lo	203119	5386224	26.5176
lp	194973	5358523	27.4834
Total	1078383	1373178447	1273.37
